# Supplementary material for: A Clinical Decision Support System for Prediction of Postpartum Hemorrhage in Vaginal Birth
Source: Research Square preprint supplement (doi:10.21203/rs.3.rs-618703/v1), 2021-06-30
Supplement: Supplementary file 2 [file 53296f17f335ab162c45d3a5.docx]

Appendix 1 Data collection table of postpartum hemorrhage medical records

|  | **Variables** | **Values** |
| --- | --- | --- |
| **Information**  **about this pregnancy**  **(n=24)** | Age at pregnancy | ­_________years |
|  | Regular prenatal checkups | □ Yes □ No |
|  | [Threatened](javascript:;) [abortion](javascript:;) | □ Yes □ No |
|  | Vaginal bleeding during pregnancy | □ Yes □ No |
|  | Vaginal discharge during pregnancy | □ Yes □ No |
|  | Pregnancy weight gain (KG) | _________KG |
|  | History of uterine surgery | _________(numbers) |
|  | [Gravidity](javascript:;) | _________(numbers) |
|  | [Parity](javascript:;) | _________(numbers) |
|  | Abortion times | _________(numbers) |
|  | Amniotic fluid index | _________(numbers) |
|  | [Placenta](javascript:;) [previa](javascript:;) | □ Yes □ No |
|  | Placenta accreta | □ Yes □ No |
|  | [Velamentous](javascript:;) [placenta](javascript:;) | □ Yes □ No |
|  | Twin pregnancy | □ Yes □ No |
|  | [Gestational](javascript:;) [diabetes](javascript:;) [mellitus](javascript:;) | □ Yes □ No |
|  | [Hypertensive](javascript:;) [disorder](javascript:;) [complicating](javascript:;) [pregnancy](javascript:;) | □ Yes □ No |
|  | [Preeclampsia](javascript:;) | □ Yes □ No |
|  | Hypothyroidism [in](javascript:;) [pregnancy](javascript:;) | □ Yes □ No |
|  | Uterine myoma [complicating](javascript:;) [pregnancy](javascript:;) | □ Yes □ No |
|  | [Uterine septum](https://pubmed.ncbi.nlm.nih.gov/27235766/) | □ Yes □ No |
|  | [Assisted](javascript:;) [reproduction](javascript:;) | □ Yes □ No |
|  | Scarred uterus | □ Yes □ No |
|  | [Rh-negative blood type in pregnancy](https://pubmed.ncbi.nlm.nih.gov/31925908/) | □ Yes □ No |
| **Information about this delivery**  **(n=17)** | Gestational age during delivery | _________weeks |
|  | [Induced](javascript:;) [labor](javascript:;) | □ Yes □ No |
|  | Premature rupture of membranes | □ Yes □ No |
|  | Artificial rupture of membranes | □ Yes □ No |
|  | Amniotic fluid pollution | □ I □ II □ III □ IV |
|  | Placental abruption | □ Yes □ No |
|  | Fetal positions | □ LOA □ROA □ OT  □ OP □ SA □SP |
|  | Operative vaginal delivery | □ Yes □ No |
|  | Episiotomy | □ Yes □ No |
|  | Newborn weight | _________g |
|  | Manual removal of placenta | □ Yes □ No |
|  | Uterine curettage | □ Yes □ No |
|  | First stage of labor duration | _________h |
|  | Second stage of labor duration | _________h |
|  | Third stage of labor duration | _________h |
|  | Numbers of umbilical cord coiling around fetal neck | _________weeks |
|  | Cervical laceration | □ Yes □ No |
| **Information**  **about laboratory testing**  **(n=8)** | [Chorioamnionitis](javascript:;) | □ Yes □ No |
|  | [Perinatal Group B streptococcal infections](https://pubmed.ncbi.nlm.nih.gov/28633864/) | □ Positive □ Negative |
|  | WBC during the first stage of labor | _________(numbers) |
|  | WBC after delivery | _________(numbers) |
|  | HGB during the first stage of labor | _________(numbers) |
|  | HGB after delivery | _________(numbers) |
|  | PLT during the first stage of labor | _________(numbers) |
|  | PLT after delivery | _________(numbers) |
